# Supplementary material for: Effect of the substituents on the spin coupling between iminosemiquinone π-radicals mediated by diamagnetic metal ions: l.s. Co(iii) vs Ga(iii)
Source: Royal Society of Chemistry journal article supplement (doi:10.1039/b717004a), 2008-01-01
Supplement: b717004a.pdf [file b717004a.pdf]

## Supplementary Material

**Preparation:** Complexes **2** - **8** were prepared in a very similar way; only a representative method is described. An argon-scrubbed solution of 2-(3,5-disubstituted aniline)-4,6-di-*tert*-butylphenol  $\text{H}_2\text{L}^{\text{R}}$  (3 mmol) in freshly distilled acetonitrile (25 mL) was stirred with either  $\text{Co}(\text{ClO}_4)_2 \cdot 6\text{H}_2\text{O}$  or  $\text{GaCl}_3$  (1 mmol) and triethylamine (0.5 mL) for 0.5 h under argon. The resulting solution was refluxed for 1 h under argon. The cooled solution was exposed to air and stirred further for 1 h upon which a dark green solid separated out. The microcrystalline solid was recrystallized from  $\text{Et}_2\text{O}-\text{CH}_2\text{CN}$  to yield dark green or deep red-brown crystals.

**Complex 2:** Yield: 72%. Anal. calcd for  $\text{C}_{66}\text{H}_{87}\text{O}_9\text{N}_3\text{Co}$ : C, 70.44; H, 7.79; N, 3.73; Co, 5.24. Found: C, 70.0; H, 7.8; N, 3.6; Co, 5.4. ESI (pos.)-MS in  $\text{CH}_2\text{Cl}_2$ :  $m/z$  1124.6 (100%)  $[\text{M}]^+$ , 769.4 (~67%)  $[\text{M}-\text{L}]^+$ . Cyclic voltammetry in  $\text{CH}_2\text{Cl}_2$ :  $\text{E}^1_{1/2}(\text{ox})$ , 0.198 V;  $\text{E}^2_{1/2}(\text{ox})$ , -0.325 V;  $\text{E}^1_{1/2}(\text{red})$ , 0.947 V;  $\text{E}^2_{1/2}(\text{red})$ , -1.286 V vs.  $\text{Fc}^+/\text{Fc}$ . IR(KBr,  $\text{cm}^{-1}$ ): 3418, 2953, 2905, 1610, 1586, 1462, 1422, 1245, 1195, 1153, 1121, 1061, 844, 856. UV-vis in THF ( $\lambda$ , nm;  $\epsilon$ ,  $\text{M}^{-1} \text{cm}^{-1}$ ): 480 ( $5.6 \times 10^3$ ), 666 ( $5.9 \times 10^3$ ), 888 ( $6.5 \times 10^3$ ).

**Complex 3:** Yield: 60%. Anal. calcd for  $\text{C}_{84}\text{H}_{123}\text{N}_3\text{O}_3\text{Co}$ : C, 78.71; H, 9.67; N, 3.28; Co, 4.60. Found: C, 78.8; H, 9.5; N, 3.7; Co, 4.7. EI-MS:  $m/z$ , 1280 (0.69%), 1281 (0.62%)  $[\text{M}]^+$ , 873 (100%), 874 (61.8%)  $[\text{M}-\text{L}]^+$ . Cyclic voltammetry in  $\text{CH}_2\text{Cl}_2$ :  $\text{E}^1_{1/2}(\text{ox})$ , 0.226,  $\text{E}^2_{1/2}(\text{ox})$ , -0.387;  $\text{E}^3_{1/2}(\text{red})$ , -1.255 V; vs.  $\text{Fc}^+/\text{Fc}$ . IR(KBr,  $\text{cm}^{-1}$ ): 3420, 2961, 2905, 2868, 1594, 1578, 1478, 1462, 1432, 1361, 1247, 1200, 1040, 1006, 953, 877, 852, 707. UV-vis in  $\text{CH}_2\text{Cl}_2$  ( $\lambda$ , nm;  $\epsilon$ ,  $\text{M}^{-1} \text{cm}^{-1}$ ): 312 ( $28.6 \times 10^3$ ), 381sh ( $-14.1 \times 10^3$ ), 477 ( $5.7 \times 10^3$ ), 661 ( $6.9 \times 10^3$ ), 883 ( $7.6 \times 10^3$ ).

**Complex 4:** Yield: 38%. Anal. calcd for  $\text{C}_{66}\text{H}_{69}\text{F}_{18}\text{N}_3\text{O}_3\text{Co}$ : C, 58.58; H, 5.14; N, 3.11; Co, 4.36. Found: C, 59.0; H, 5.1; N, 3.1; Co, 4.5. ESI(pos.)-MS in  $\text{CH}_2\text{Cl}_2$ : 1352.4 (~60%)  $[\text{M}]^+$ , 921.3 (100%),  $[\text{M}-\text{L}]^+$ . Cyclic and square-wave voltammetry in  $\text{CH}_2\text{Cl}_2$ :  $\text{E}^1_{1/2}(\text{ox})$ , 0.469,  $\text{E}^2_{1/2}(\text{ox})$ , -0.04;  $\text{E}^3_{1/2}(\text{red})$ , -0.812;  $\text{E}^4_{1/2}(\text{red})$ , -1.128 V vs.  $\text{Fc}^+/\text{Fc}$ . IR(KBr,  $\text{cm}^{-1}$ ): 3456, 2959, 1617, 1582, 1478, 1431, 1380, 1364, 1325, 1278, 1173, 1138, 1036, 1005, 949, 894, 847, 717, 701, 682. UV-vis in THF ( $\lambda$ , nm;  $\epsilon$ ,  $\text{M}^{-1} \text{cm}^{-1}$ ): 372 ( $11.3 \times 10^3$ ), 655 ( $4.08 \times 10^3$ ), 913 ( $5.2 \times 10^3$ ).

**Complex 5:** Yield: 35%. Anal. calcd for  $\text{C}_{60}\text{H}_{69}\text{F}_6\text{N}_3\text{O}_3\text{Co}$ : C, 68.43; H, 6.60; N, 3.99; Co, 5.60. Found: C, 68.6; H, 6.6; N, 4.0; Co, 5.7. ESI(pos.)-MS in  $\text{C}_2\text{H}_5\text{OC}_2\text{H}_5$ : 1052.6 (100%)  $[\text{M}]^+$ , 721.3  $[\text{M}-\text{L}]^+$ . Cyclic and square-wave voltammetry in  $\text{CH}_2\text{Cl}_2$ :  $\text{E}^1_{1/2}(\text{ox})$ , 0.334,  $\text{E}^2_{1/2}(\text{ox})$ , -0.193;  $\text{E}^3_{1/2}(\text{red})$ , -0.802;  $\text{E}^4_{1/2}(\text{red})$ , -1.168 V vs.  $\text{Fc}^+/\text{Fc}$ . IR(KBr,  $\text{cm}^{-1}$ ): 3418, 3115, 3089, 2952, 2906, 2867, 1612, 1591, 1461, 1447, 1427, 1387, 1361, 1337, 1246, 1195, 1135, 1117, 1038, 1013, 993, 962, 830, 768, 682, 661, 641. UV-vis in  $\text{CH}_2\text{Cl}_2$  ( $\lambda$ , nm;  $\epsilon$ ,  $\text{M}^{-1} \text{cm}^{-1}$ ): 918 ( $11.5 \times 10^3$ ), 685 ( $7.6 \times 10^3$ ), 367 ( $12.1 \times 10^3$ ).

**Complex 6:** Yield: 70%. Anal. calcd for  $\text{C}_{84}\text{H}_{123}\text{N}_3\text{O}_3\text{Ga}$ : C, 78.05; H, 9.59; N, 3.25; Ga, 5.39. Found: C, 77.7; H, 9.6; N, 3.0; Ga, 5.5. EI-MS:  $m/z$  1292 (3.76%)  $[\text{M}]^+$ , 883 (100%)  $[\text{M}-\text{L}]^+$ . Cyclic voltammetry in  $\text{CH}_2\text{Cl}_2$ :  $\text{E}^1_{1/2}(\text{ox})$  = 0.445,  $\text{E}^2_{1/2}(\text{ox})$  = +0.152,  $\text{E}^3_{1/2}(\text{ox})$  = -0.240 V vs.  $\text{Fc}^+/\text{Fc}$ . IR(KBr,  $\text{cm}^{-1}$ ): 3418, 3080, 2961, 2905, 2868, 1581, 1469, 1439, 1421, 1386, 1362, 1334, 1248, 1200, 1038, 1004, 953, 875, 856, 833, 721, 707, 645, 630, 608. UV-vis in  $\text{CH}_2\text{Cl}_2$  ( $\lambda$ , nm;  $\epsilon$ ,  $\text{M}^{-1} \text{cm}^{-1}$ ): 767 ( $3.5 \times 10^3$ ), 510 ( $1.98 \times 10^3$ ), 321 ( $20.4 \times 10^3$ ).

**Complex 7:** Yield: 30%. Anal. calcd for  $\text{C}_{66}\text{H}_{69}\text{F}_{18}\text{N}_3\text{O}_3\text{Ga}$ : C, 58.12; H, 5.10; N, 3.08; Ga, 5.11. Found: C, 58.0; H, 5.1; N, 3.1;

Ga, 5.0. EI-MS:  $m/z$  1364 (14.4%)  $[\text{M}]^+$ , 931 (100%)  $[\text{M}-\text{L}]^+$ . IR(KBr,  $\text{cm}^{-1}$ ): 3463, 2963, 1584, 1477, 1439, 1381, 1365, 1353, 1277, 1176, 1143, 1130, 1003, 947, 893, 851, 712, 702, 683, 621. UV-vis in  $\text{CH}_2\text{Cl}_2$  ( $\lambda$ , nm;  $\epsilon$ ,  $\text{M}^{-1} \text{cm}^{-1}$ ): 805 ( $3.7 \times 10^3$ ), 365 ( $16.7 \times 10^3$ ), 288 ( $21.3 \times 10^3$ ).

**Complex 8:** Yield: 40%. Anal. calcd for  $\text{C}_{60}\text{H}_{69}\text{Cl}_6\text{N}_3\text{O}_3\text{Ga}$ : C, 61.98; H, 5.98; N, 3.61; Ga, 6.00. Found: C, 61.8; H, 6.0; N, 3.7; Ga, 5.8. EI-MS:  $m/z$  1162 (100%)  $[\text{M}]^+$ , 797 (~30%)  $[\text{M}-\text{L}]^+$ . IR(KBr,  $\text{cm}^{-1}$ ): 3421, 3081, 2958, 2906, 2869, 1573, 1560, 1467, 1440, 1420, 1388, 1356, 1333, 1257, 1107, 1033, 1003, 940, 850, 799, 718, 675, 647.

### Crystallographic Data.

**Complex 2:**  $[\text{C}_{66}\text{H}_{87}\text{O}_9\text{N}_3\text{Co}]^{1/2} \cdot (\text{C}_2\text{H}_5)_2\text{O}$ ;  $M_f$  = 1161.38,  $T$  = 100(2) K, monoclinic,  $a$  = 12.9603(6) Å,  $b$  = 22.0793(12) Å,  $c$  = 22.8771(12) Å,  $\beta$  = 95.07(1)°,  $V$  = 6520.8(6) Å<sup>3</sup>, space group  $P2_1/c$ ,  $Z$  = 4,  $D_c$  = 1.184 g cm<sup>-3</sup>,  $F(000)$  = 2496,  $\lambda(\text{MoK}\alpha)$  = 0.71073 Å,  $\mu$  = 0.320 mm<sup>-1</sup>. A total of 15482 independent reflections was used for solution and refinement (SHELX97) by full-matrix least squares on  $F^2$ ; no absorption correction. Final R indices:  $R_1$  = 0.0363,  $R_1$  (all data) = 0.0478.

**Complex 3:**  $\text{C}_{84}\text{H}_{123}\text{N}_3\text{O}_3\text{Co}$ ,  $M_f$  = 1281.78,  $T$  = 100(2) K, monoclinic,  $a$  = 16.1355(4) Å,  $b$  = 14.5516(4) Å,  $c$  = 34.0664(8) Å,  $\beta$  = 97.77(1)°,  $V$  = 7925.3(3) Å<sup>3</sup>, space group  $P2_1/c$ ,  $Z$  = 4,  $D_c$  = 1.074 g cm<sup>-3</sup>,  $F(000)$  = 2796,  $\lambda(\text{MoK}\alpha)$  = 0.71073 Å,  $\mu$  = 0.263 mm<sup>-1</sup>. A total of 18094 independent reflections was used for solution and refinement (SHELX97) by full-matrix least squares on  $F^2$ ; no absorption correction, Gaussian, face-indexed. Final R indices:  $R_1$  = 0.0480,  $R_1$  (all data) = 0.0674.

**Complex 4:**  $\text{C}_{66}\text{H}_{69}\text{F}_{18}\text{ON}_3\text{O}_3\text{Co}$ ,  $M_f$  = 1353.17,  $T$  = 100(2) K, monoclinic,  $a$  = 13.3974(3) Å,  $b$  = 22.8936(9) Å,  $c$  = 21.4790(9) Å,  $\beta$  = 90.494(5)°,  $V$  = 6587.7(4) Å<sup>3</sup>, space group  $P2_1/n$ ,  $Z$  = 4,  $D_c$  = 1.364 g cm<sup>-3</sup>,  $F(000)$  = 2796,  $\lambda(\text{MoK}\alpha)$  = 0.71073 Å,  $\mu$  = 0.358 mm<sup>-1</sup>. A total of 19130 independent reflections was used for solution and refinement (SHELX97) by full-matrix least squares on  $F^2$ ; absorption correction, Gaussian. Final R indices:  $R_1$  = 0.0503,  $R_1$  (all data) = 0.0656.

**Complex 5:**  $\text{C}_{60}\text{H}_{69}\text{F}_6\text{N}_3\text{O}_3\text{Co}$ ,  $M_f$  = 1053.11,  $T$  = 100(2) K, triclinic,  $a$  = 10.6439(3) Å,  $b$  = 14.7847(4) Å,  $c$  = 17.7515(6) Å,  $\alpha$  = 96.64(1)°,  $\beta$  = 94.02(1)°,  $\gamma$  = 94.25(1)°,  $V$  = 2758.4(1) Å<sup>3</sup>, space group  $P-1$ ,  $Z$  = 2,  $D_c$  = 1.268 g cm<sup>-3</sup>,  $F(000)$  = 1110,  $\lambda(\text{MoK}\alpha)$  = 0.71073 Å,  $\mu$  = 0.378 mm<sup>-1</sup>. A total of 17661 independent reflections was used for solution and refinement (SHELX97) by full-matrix least squares on  $F^2$ ; absorption correction, Gaussian, face indexed. Final R indices:  $R_1$  = 0.0457,  $R_1$  (all data) = 0.0647.

**Complex 6:**  $\text{C}_{84}\text{H}_{123}\text{N}_3\text{O}_3\text{Ga}$ ,  $M_f$  = 1292.57,  $T$  = 100(2) K, monoclinic,  $a$  = 16.4504(3) Å,  $b$  = 14.6410(3) Å,  $c$  = 33.8237(6) Å,  $\beta$  = 96.57(1)°,  $V$  = 8092.9(3) Å<sup>3</sup>, space group  $P2_1/c$ ,  $Z$  = 4,  $D_c$  = 1.061 g cm<sup>-3</sup>,  $F(000)$  = 2812,  $\lambda(\text{MoK}\alpha)$  = 0.71073 Å,  $\mu$  = 0.385 mm<sup>-1</sup>. A total of 19839 independent reflections was used for solution and refinement (SHELX97) by full-matrix least squares on  $F^2$ ; no absorption correction. Final R indices:  $R_1$  = 0.0443,  $R_1$  (all data) = 0.0554.

**Complex 8:**  $\text{C}_{63}\text{H}_{76.5}\text{Cl}_6\text{N}_3\text{O}_3\text{Ga}$ ,  $M_f$  = 1213.20,  $T$  = 100(2) K, monoclinic,  $a$  = 18.2999(9) Å,  $b$  = 19.7567(9) Å,  $c$  = 35.0963(15) Å,  $\beta$  = 93.22(1)°,  $V$  = 12668.9(10) Å<sup>3</sup>, space group  $C2/c$ ,  $Z$  = 8,  $D_c$  = 1.272 g cm<sup>-3</sup>,  $F(000)$  = 5088,  $\lambda(\text{MoK}\alpha)$  = 0.71073 Å,  $\mu$  = 0.733 mm<sup>-1</sup>. A total of 8277 independent reflections was used for solution and refinement (SHELX97) by full-matrix least squares on  $F^2$ ; no absorption correction. Final R indices:  $R_1$  = 0.1143,  $R_1$  (all data) = 0.1368.

## Supplementary Material

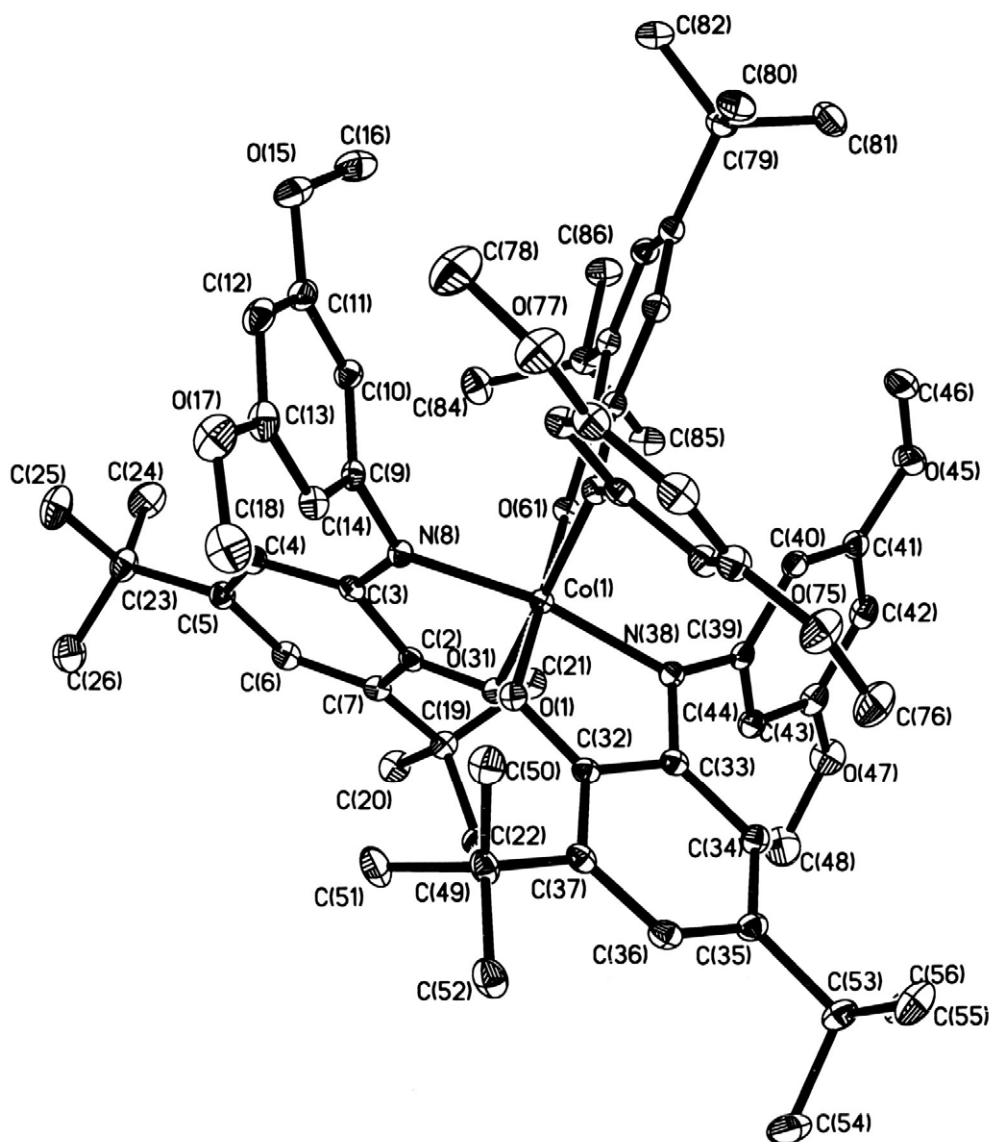

**Figure S1.** Molecular structure of complex **2**, [Co<sup>III</sup>(L<sup>OCH<sub>3</sub>\*</sup>)] with selected bond lengths (Å) and angles (°): Co(1)-O(61) 1.8848(9), Co(1)-O(31) 1.8893(9), Co(1)-O(1) 1.9039(9), Co(1)-N(68) 1.9187(11), Co(1)-N(8) 1.9249(11), Co(1)-N(38) 1.9302(11), N(8)-C(9) 1.4236(17), N(8)-C(3) 1.3432(17), C(2)-O(1) 1.3046(16), C(32)-O(31) 1.3047(16), C(62)-O(61) 1.3053(16), O(61)-Co(1)-O(31) 178.90(4), O(1)-Co(1)-N(68) 170.58(4), N(8)-Co(1)-N(38) 168.54(5).

## Supplementary Material

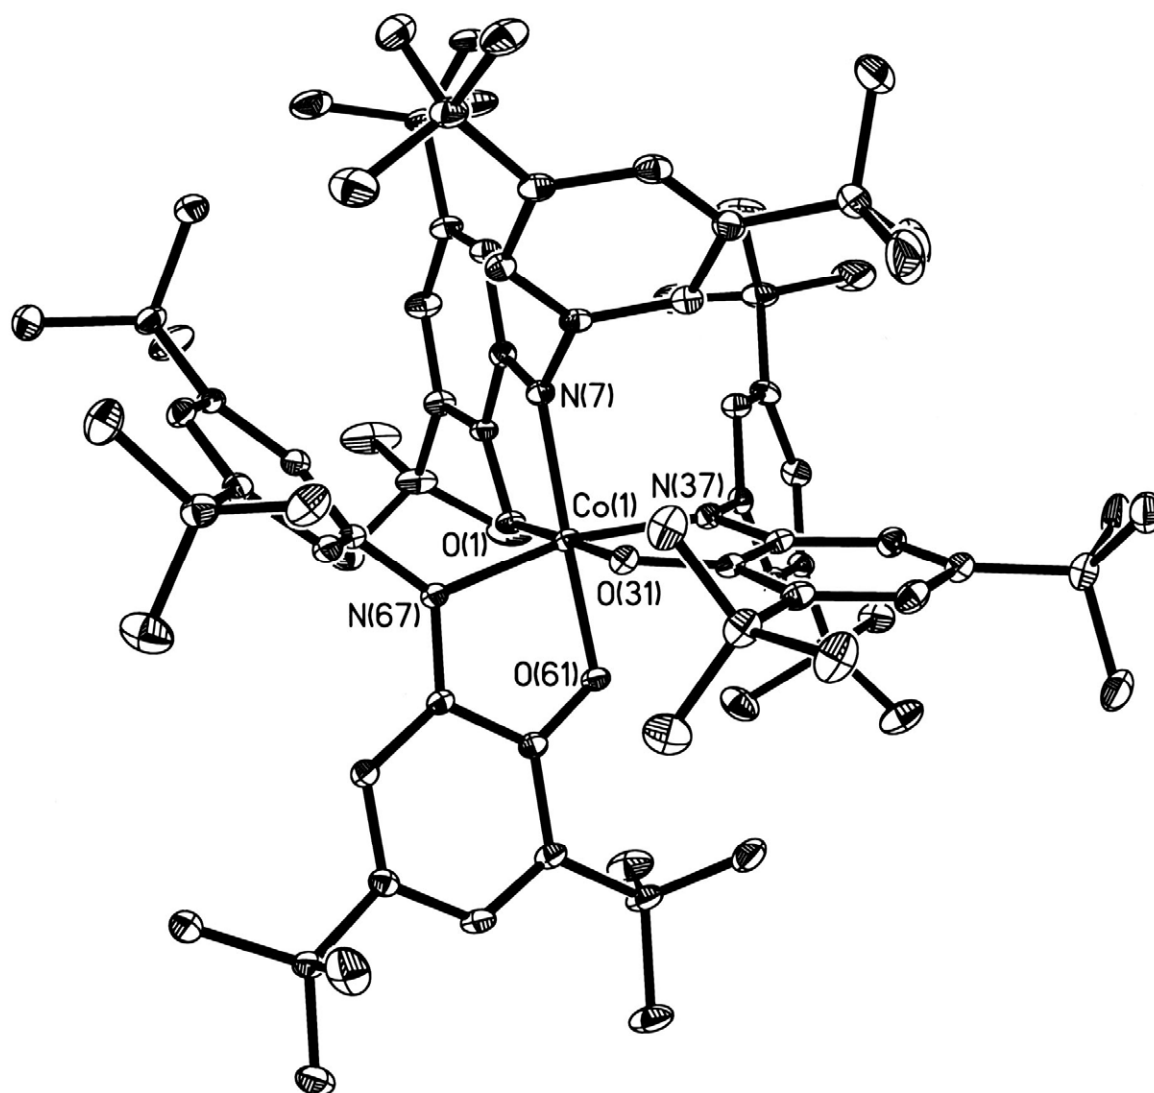

**Figure S2.** Molecular structure of complex **3**,  $[\text{Co}^{\text{III}}(\text{L}^{\text{t-Bu}^*})_3]$  with selected bond lengths (Å) and angles ( $^\circ$ ): Co(1)-O(31) 1.8754(11), Co(1)-O(1) 1.8818(11), Co(1)-O(61) 1.8896(11), Co(1)-N(37) 1.9118(14), Co(1)-N(7) 1.9177(13), Co(1)-N(67) 1.9389(14), C(6)-N(7) 1.346(2), C(8)-N(7) 1.433(2), O(31)-C(31) 1.3020(19), O(1)-C(1) 1.3007(19), O(61)-C(61) 1.296(2), O(31)-Co(1)-O(1) 178.65(5), O(61)-Co(1)-N(7) 173.17(5), N(37)-Co(1)-N(67) 165.24(6).

## Supplementary Material

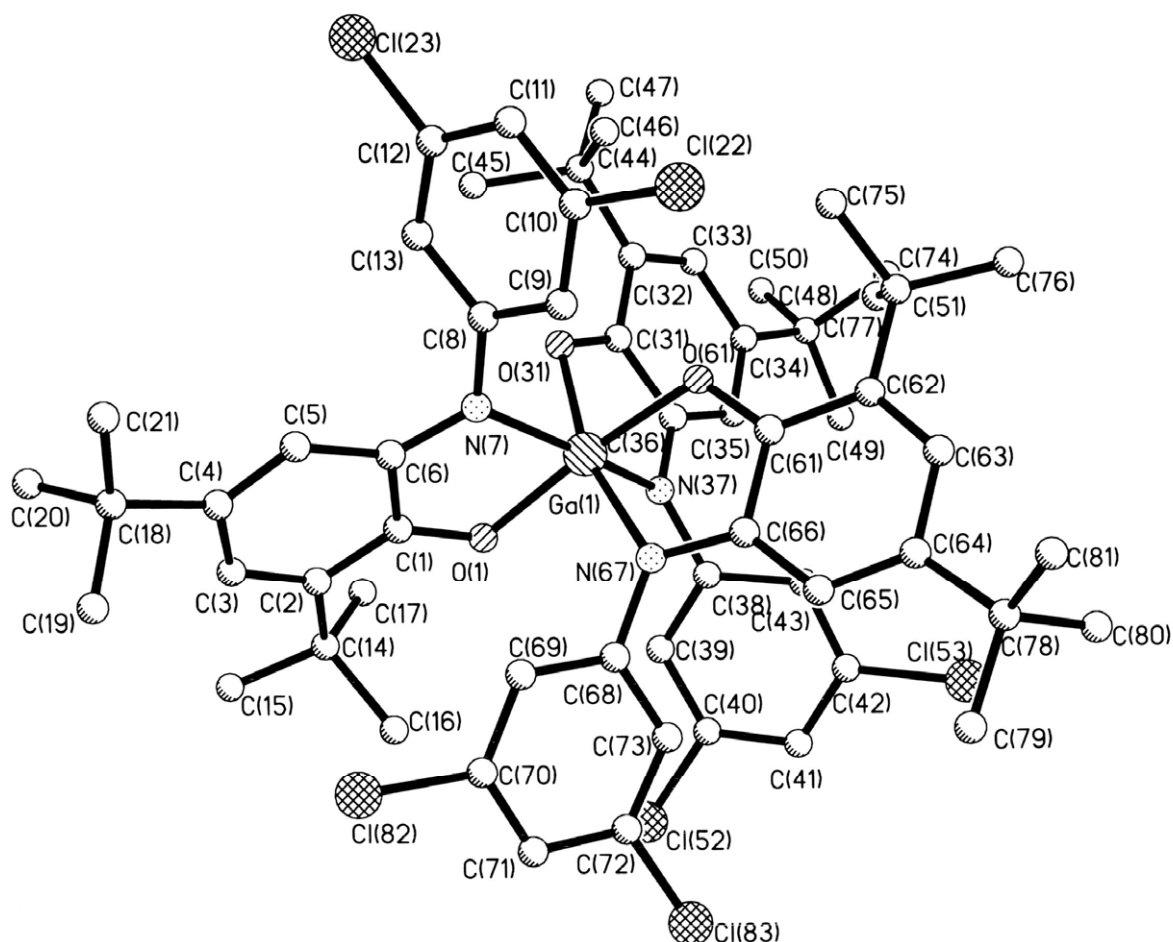

**Figure S3.** Molecular structure of complex **8**  $[\text{Ga}^{\text{III}}(\text{L}^{\text{Cl}})_3]$  with selected bond lengths (Å) and angles ( $^\circ$ ): Ga(1)-O(1) 1.935(8), Ga(1)-O(61) 1.954(8), Ga(1)-O(31) 1.965(8), Ga(1)-N(7) 2.027(10), Ga(1)-N(37) 2.044(10), Ga(1)-N(67) 2.068(10), O(1)-C(1) 1.316(15), O(1)-Ga(1)-O(61) 174.4(3), N(7)-Ga(1)-N(37) 164.0(4), O(31)-Ga(1)-N(67) 164.2(4).
